# Supplementary material for: Fear extinction learning and anandamide: an fMRI study in healthy humans
Source: PubMed Central journal article supplement (PMC7961038; doi:10.1038/s41398-020-01177-7), 2021-03-15

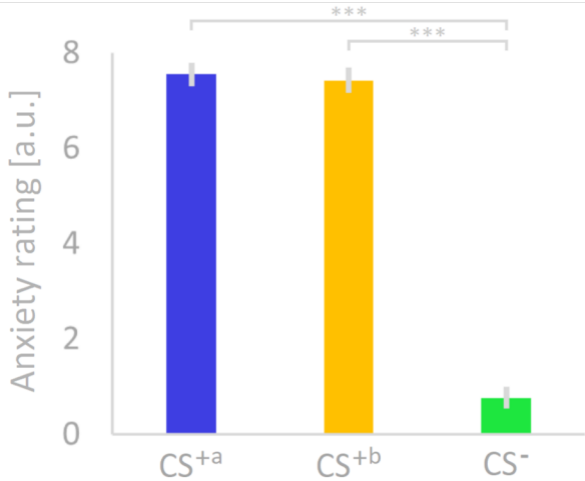

Supplement: 41398_2020_1177_MOESM2_ESM.pdf [file 41398_2020_1177_MOESM2_ESM.pdf]
